# Supplementary material for: Distribution of Glycerol Dialkyl Glycerol Tetraethers (GDGTs) in Carbonate-Type and Sulfate-Type Lacustrine Sediments: Insight into the Influence of Ionic Composition on GDGTs
Source: MDPI journal article supplement (doi:10.3390/min12101233), 2022-09-28
Supplement: s1 [file s1]

## Article

# Distribution of Glycerol Dialkyl Glycerol Tetraethers (GDGTs) in Carbonate-type and Sulfate-type Lacustrine Sediments: Insight into the Influence of Ionic Composition on GDGTs

Yongxin Chen <sup>1</sup>, Xilong Zhang <sup>1</sup>, Wen Qi <sup>2</sup>, Gaoqing Zhang <sup>3</sup>, Yu Pei <sup>1,4</sup>, Xuan Fang <sup>1</sup>, Yanqing Xia <sup>1,\*</sup> and Shengyin Zhang <sup>1,\*</sup>

<sup>1</sup> Northwest Institute of Eco-Environment and Resources, Chinese Academy of Sciences/Key Laboratory of Petroleum Resources, Lanzhou 730000, China

<sup>2</sup> Research Institute of Petroleum Exploration and Development - Northwest (NWGI), PetroChina, Lanzhou 730020, China

<sup>3</sup> College of Vanadium and Titanium, Panzhihua University, Panzhihua 617000, China

<sup>4</sup> University of Chinese Academy of Sciences, Beijing 100049, China

\* Correspondence: yqxia@lzb.ac.cn (Y.X.); zhangshengyin@nieer.ac.cn (S.Z.)

**Keywords:** carbonate-type saline lake; sulfate-type saline lake; ionic composition; GDGTs; reconstructed temperature

**Citation:** Chen, Y.; Zhang, X.; Qi, W.; Zhang, G.; Pei, Y.; Fang, X.; Xia, Y.; Zhang, S. Distribution of glycerol dialkyl glycerol tetraethers (GDGTs) in carbonate-type and sulfate-type lacustrine sediments: Insight into the influence of ionic composition on GDGTs. *Minerals* **2022**, *12*, 1233. <https://doi.org/10.3390/min12101233>

**Academic Editor(s):** Qi Fu and Thomas Gentzis

Received: 14 August 2022

Accepted: 24 September 2022

Published: date

**Publisher's Note:** MDPI stays neutral with regard to jurisdictional claims in published maps and institutional affiliations.

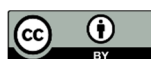

**Copyright:** © 2022 by the authors. Submitted for possible open access publication under the terms and conditions of the Creative Commons Attribution (CC BY) license (<https://creativecommons.org/licenses/by/4.0/>).

## 1. Major elemental chemistry analysis

Major elemental chemistry of the samples was determined by Inductively Coupled Plasma Mass Spectrometer (ICP-MS; 7850 Agilent). Approximately 100 mg of each sample was acid digested in Digestion tank with a mixture of 1 mL HF and 0.5 mL HNO<sub>3</sub> at 185°C for 24 h. After cooling, the tank was heat to dry. Then the sample was added 5 mL nitric acid and heated at 130°C for 3 h. Finally, the sample was volutized to 50 mL for ICP-MS analysis.

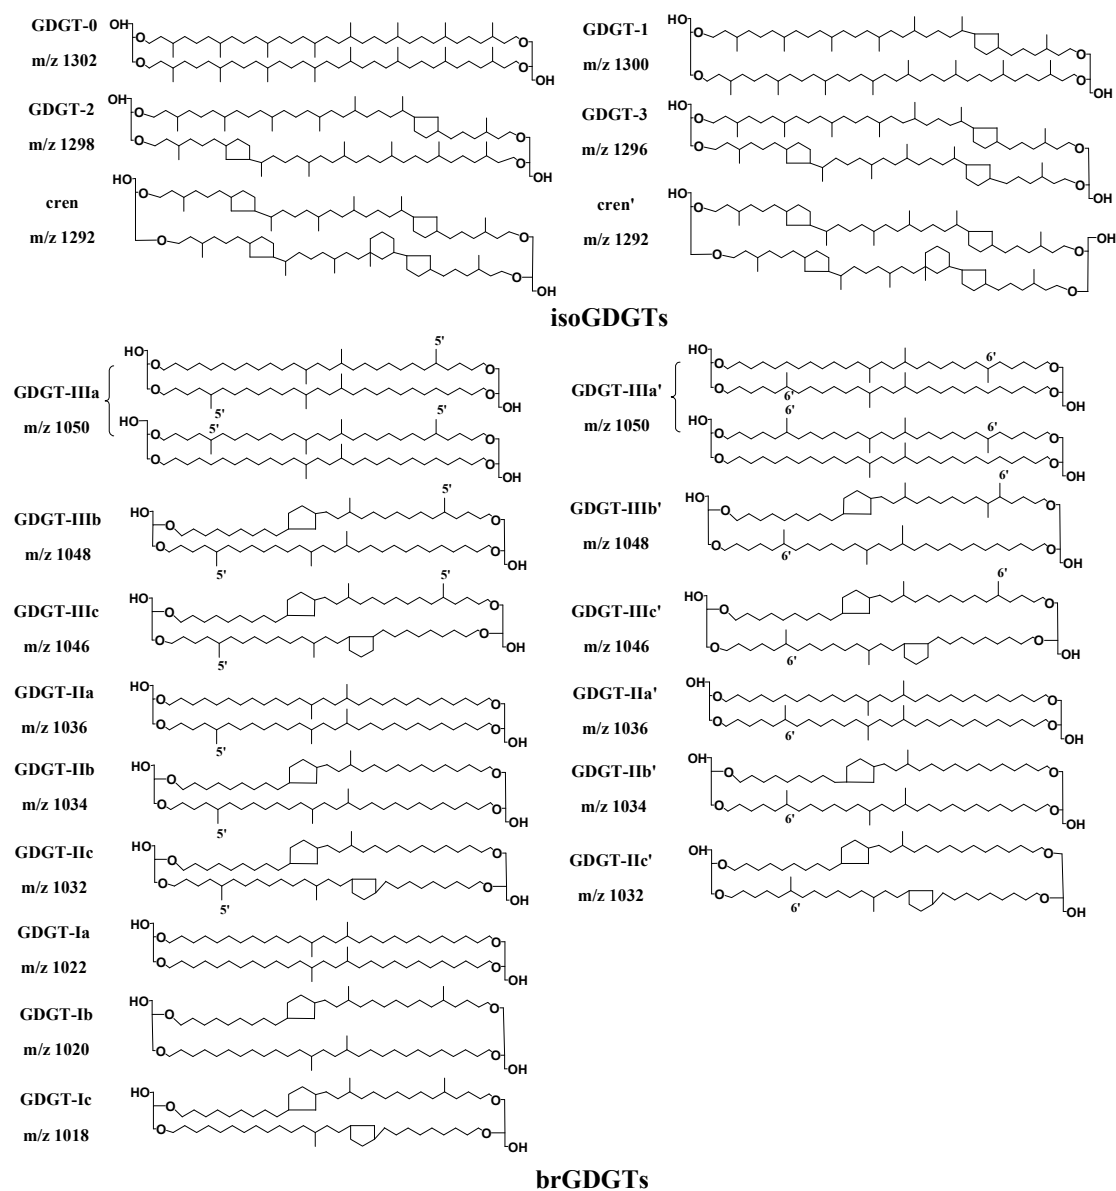

**Figure S1.** Structures and molecular ion mass/charge ratios (m/z) for glycerol dialkyl glycerol tetraethers (GDGTs).

**Table S1.** Different calculation formulas for GDGTs.

| No. | Formulas <sup>a</sup>                                                                                                                                                                                                                                                                                                                                                                                                                                                                                                                                                                                       | References |
|-----|-------------------------------------------------------------------------------------------------------------------------------------------------------------------------------------------------------------------------------------------------------------------------------------------------------------------------------------------------------------------------------------------------------------------------------------------------------------------------------------------------------------------------------------------------------------------------------------------------------------|------------|
| 1   | $\text{TEX}_{86} = (\text{GDGT-2} + \text{GDGT-3} + \text{Cren}') / (\text{GDGT-1} + \text{GDGT-2} + \text{GDGT-3} + \text{Cren}')$                                                                                                                                                                                                                                                                                                                                                                                                                                                                         | [1]        |
| 2   | $\text{BIT} = (\text{Ia} + \text{IIa} + \text{IIa}' + \text{IIIa} + \text{IIIa}') / (\text{Ia} + \text{IIa} + \text{IIa}' + \text{IIIa} + \text{IIIa}' + \text{cren})$                                                                                                                                                                                                                                                                                                                                                                                                                                      | [2]        |
| 3   | $\text{ACE} = \text{archaeol} / (\text{archaeol} + \text{GDGT-0}) \times 100$                                                                                                                                                                                                                                                                                                                                                                                                                                                                                                                               | [3]        |
| 4   | $R_{i/b} = \sum \text{isoGDGTs} / \sum \text{brGDGTs}$                                                                                                                                                                                                                                                                                                                                                                                                                                                                                                                                                      | [4]        |
| 5   | $\text{MBT} = (\text{Ia} + \text{Ib} + \text{Ic}) / (\text{Ia} + \text{Ib} + \text{Ic} + \text{IIa} + \text{IIa}' + \text{IIb} + \text{IIb}' + \text{IIc} + \text{IIc}' + \text{IIIa} + \text{IIIa}' + \text{IIIb} + \text{IIIb}' + \text{IIIc} + \text{IIIc}')$                                                                                                                                                                                                                                                                                                                                            | [5]        |
| 6   | $\text{MBT}' = (\text{Ia} + \text{Ib} + \text{Ic}) / (\text{Ia} + \text{Ib} + \text{Ic} + \text{IIa} + \text{IIa}' + \text{IIb} + \text{IIb}' + \text{IIc} + \text{IIc}' + \text{IIIa} + \text{IIIa}')$                                                                                                                                                                                                                                                                                                                                                                                                     | [6]        |
| 7   | $\text{CBT} = -\log[(\text{Ib} + \text{IIb} + \text{IIb}') / (\text{Ia} + \text{IIa} + \text{IIa}')] ]$                                                                                                                                                                                                                                                                                                                                                                                                                                                                                                     | [5]        |
| 8   | $\text{MBT}'_{5\text{ME}} = (\text{Ia} + \text{Ib} + \text{Ic}) / (\text{Ia} + \text{Ib} + \text{Ic} + \text{IIa} + \text{IIb} + \text{IIc} + \text{IIIa})$                                                                                                                                                                                                                                                                                                                                                                                                                                                 | [7]        |
| 9   | $\text{CBT}_{5\text{ME}} = -\log[(\text{Ib} + \text{IIb}) / (\text{Ia} + \text{IIa})]$                                                                                                                                                                                                                                                                                                                                                                                                                                                                                                                      | [7]        |
| 10  | $\text{MBT}'_{6\text{ME}} = (\text{Ia} + \text{Ib} + \text{Ic}) / (\text{Ia} + \text{Ib} + \text{Ic} + \text{IIa}' + \text{IIb}' + \text{IIc}' + \text{IIIa}')$                                                                                                                                                                                                                                                                                                                                                                                                                                             | [7]        |
| 11  | $\text{CBT}_{6\text{ME}} = -\log[(\text{Ib} + \text{IIb}') / (\text{Ia} + \text{IIa}')] ]$                                                                                                                                                                                                                                                                                                                                                                                                                                                                                                                  | [7]        |
| 12  | $\text{IR}_{6\text{ME}} = (\text{IIa}' + \text{IIb}' + \text{IIc}' + \text{IIIa}' + \text{IIIb}' + \text{IIIc}') / (\text{IIa} + \text{IIa}' + \text{IIb} + \text{IIb}' + \text{IIc} + \text{IIc}' + \text{IIIa} + \text{IIIa}' + \text{IIIb} + \text{IIIb}' + \text{IIIc} + \text{IIIc}')$                                                                                                                                                                                                                                                                                                                 | [7]        |
| 13  | $[\text{x}]_{5\text{ME}} = \text{x} / \text{IIIa} + \text{IIIb} + \text{IIIc} + \text{IIa} + \text{IIb} + \text{IIc} + \text{Ia} + \text{Ib} + \text{Ic}$<br>$[\text{y}]_{6\text{ME}} = \text{y} / \text{IIIa}' + \text{IIIb}' + \text{IIIc}' + \text{IIa}' + \text{IIb}' + \text{IIc}' + \text{Ia} + \text{Ib} + \text{Ic}$                                                                                                                                                                                                                                                                                | [8]        |
| 14  | $\text{MAAT}_{\text{Tierney2010}} = 11.8 + 32.5 \times \text{MBT} - 9.3 \times \text{CBT}$                                                                                                                                                                                                                                                                                                                                                                                                                                                                                                                  | [9]        |
| 15  | $\text{MAAT}_{\text{Tierney2010}'} = 50.47 - 74.18 \times f(\text{IIIa} + \text{IIIa}') - 31.60 \times f(\text{IIa} + \text{IIa}') - 34.69 \times f(\text{Ia})$                                                                                                                                                                                                                                                                                                                                                                                                                                             | [9]        |
| 16  | $\text{MAAT}_{\text{Loomis}} = 2.54 - 5.02 \times \text{CBT} + 45.28 \times \text{MBT}$                                                                                                                                                                                                                                                                                                                                                                                                                                                                                                                     | [10]       |
| 17  | $\text{MAAT}_{\text{Loomis2012}'} = 36.9 - 50.1 \times f(\text{IIIa} + \text{IIIa}') - 35.5 \times f(\text{IIa} + \text{IIa}') - 1.0 \times f(\text{Ia})$                                                                                                                                                                                                                                                                                                                                                                                                                                                   | [10]       |
| 18  | $\text{MAAT}_{\text{Sun2011}} = 6.803 - 7.062 \times \text{CBT} + 37.090 \times \text{MBT}$                                                                                                                                                                                                                                                                                                                                                                                                                                                                                                                 | [11]       |
| 19  | $\text{MSAT}_{\text{Pearson2011}} = 20.9 + 98.1 \times f(\text{Ib}) - 12.0 \times f(\text{IIa} + \text{IIa}') - 20.5 \times f(\text{IIIa} + \text{IIIa}')$                                                                                                                                                                                                                                                                                                                                                                                                                                                  | [12]       |
| 20  | $\text{MSAT}_{\text{Foster2016}} = 18.7 + 80.3 \times f(\text{Ib}) - 25.3 \times f(\text{IIa} + \text{IIa}') - 19.4 \times f(\text{IIIa} + \text{IIIa}') + 369.9 \times f(\text{IIIb})$                                                                                                                                                                                                                                                                                                                                                                                                                     | [13]       |
| 21  | $\text{MAAT}_{\text{Gunther2014}} = -3.84 + 9.84 \times \text{CBT} + 5.92 \times \text{MBT}'$                                                                                                                                                                                                                                                                                                                                                                                                                                                                                                               | [14]       |
| 22  | $\text{Growth T}_{\text{Dang2018}} = -29.73 \times [\text{IIIa}]_{5\text{ME}} + 91.97 \times [\text{IIIb}]_{5\text{ME}} - 551.02 \times [\text{IIIc}]_{5\text{ME}} + 22.65 \times [\text{IIb}]_{5\text{ME}} + 3.19 \times [\text{Ib}]_{5\text{ME}} - 4.23 \times [\text{IIIa}']_{6\text{ME}} - 147.28 \times [\text{IIIb}']_{6\text{ME}} + 460.10 \times [\text{IIIc}']_{6\text{ME}} - 14.59 \times [\text{IIa}']_{6\text{ME}} + 40.02 \times [\text{IIb}']_{6\text{ME}} - 230.78 \times [\text{IIc}']_{6\text{ME}} + 7.54 \times [\text{Ia}]_{6\text{ME}} + 29.48 \times [\text{Ic}]_{6\text{ME}} + 12.73$ | [8]        |

**Table S2.** Fractional abundances of individual isoGDGTs and the concentrations of total isoGDGTs for the 13 surface sediments.

| Sample | Fractional abundance of isoGDGTs |        |        |        |       |       | Total isoGDGTs<br>(ug/g TOC) |
|--------|----------------------------------|--------|--------|--------|-------|-------|------------------------------|
|        | GDGT-0                           | GDGT-1 | GDGT-2 | GDGT-3 | cren  | cren' |                              |
| HH     | 0.884                            | 0.027  | 0.018  | 0.007  | 0.058 | 0.006 | 12.63                        |
| DL     | 0.840                            | 0.031  | 0.032  | 0.009  | 0.079 | 0.008 | 43.08                        |
| NL     | 0.866                            | 0.061  | 0.054  | 0.010  | 0.009 | 0.001 | 319.78                       |
| HM     | 0.931                            | 0.019  | 0.037  | 0.003  | 0.009 | 0.001 | 20.93                        |
| SU     | 0.903                            | 0.038  | 0.014  | 0.004  | 0.037 | 0.004 | 165.76                       |
| HD     | 0.897                            | 0.020  | 0.067  | 0.003  | 0.011 | 0.002 | 191.07                       |
| DK     | 0.923                            | 0.022  | 0.015  | 0.004  | 0.032 | 0.004 | 47.10                        |
| WH     | 0.672                            | 0.032  | 0.037  | 0.013  | 0.229 | 0.016 | 3.02                         |
| GC     | 0.890                            | 0.038  | 0.027  | 0.003  | 0.037 | 0.005 | 55.61                        |
| LN     | 0.756                            | 0.076  | 0.123  | 0.022  | 0.020 | 0.003 | 33.95                        |
| BL     | 0.765                            | 0.078  | 0.040  | 0.007  | 0.103 | 0.008 | 3.45                         |
| LH     | 0.848                            | 0.021  | 0.030  | 0.007  | 0.086 | 0.009 | 3.54                         |
| HY     | 0.814                            | 0.061  | 0.046  | 0.006  | 0.064 | 0.009 | 14.97                        |

**Table S3.** Fractional abundances of individual brGDGTs and the concentrations of total brGDGTs and GDGTs for the 13 surface sediments.

1

| Sample | Fractional abundance of brGDGTs |       |       |       |       |       |       |       |       |       |       |       |       |       |       | brGDGTs<br>(ug/g TOC) | Total GDGTs<br>(ug/g TOC) |
|--------|---------------------------------|-------|-------|-------|-------|-------|-------|-------|-------|-------|-------|-------|-------|-------|-------|-----------------------|---------------------------|
|        | IIIa                            | IIIa' | IIIb  | IIIb' | IIIc  | IIIc' | IIa   | IIa'  | IIb   | IIb'  | IIc   | IIc'  | Ia    | Ib    | Ic    |                       |                           |
| HH     | 0.019                           | 0.187 | 0.000 | 0.000 | 0.000 | 0.000 | 0.037 | 0.293 | 0.011 | 0.081 | 0.003 | 0.012 | 0.274 | 0.062 | 0.021 | 12.01                 | 24.64                     |
| DL     | 0.105                           | 0.098 | 0.000 | 0.000 | 0.000 | 0.000 | 0.182 | 0.148 | 0.041 | 0.107 | 0.005 | 0.014 | 0.162 | 0.116 | 0.021 | 119.07                | 162.15                    |
| NL     | 0.046                           | 0.138 | 0.007 | 0.004 | 0.001 | 0.000 | 0.171 | 0.148 | 0.036 | 0.048 | 0.003 | 0.005 | 0.305 | 0.073 | 0.015 | 206.46                | 526.24                    |
| HM     | 0.043                           | 0.106 | 0.000 | 0.000 | 0.000 | 0.000 | 0.172 | 0.137 | 0.029 | 0.048 | 0.006 | 0.007 | 0.375 | 0.059 | 0.018 | 3.06                  | 23.99                     |
| SU     | 0.030                           | 0.176 | 0.002 | 0.002 | 0.000 | 0.000 | 0.141 | 0.219 | 0.028 | 0.023 | 0.003 | 0.008 | 0.322 | 0.037 | 0.010 | 199.80                | 365.56                    |
| HD     | 0.039                           | 0.184 | 0.000 | 0.000 | 0.000 | 0.000 | 0.104 | 0.192 | 0.022 | 0.100 | 0.003 | 0.010 | 0.258 | 0.073 | 0.014 | 14.93                 | 206.00                    |
| DK     | 0.043                           | 0.182 | 0.000 | 0.000 | 0.000 | 0.000 | 0.082 | 0.185 | 0.015 | 0.079 | 0.003 | 0.009 | 0.332 | 0.056 | 0.013 | 19.89                 | 66.99                     |
| WH     | 0.039                           | 0.227 | 0.000 | 0.000 | 0.000 | 0.000 | 0.046 | 0.265 | 0.039 | 0.101 | 0.003 | 0.007 | 0.163 | 0.095 | 0.014 | 1.18                  | 4.20                      |
| GC     | 0.025                           | 0.206 | 0.000 | 0.000 | 0.000 | 0.000 | 0.034 | 0.358 | 0.018 | 0.087 | 0.027 | 0.007 | 0.175 | 0.046 | 0.016 | 5.34                  | 60.94                     |
| LN     | 0.023                           | 0.134 | 0.000 | 0.000 | 0.000 | 0.000 | 0.031 | 0.264 | 0.022 | 0.122 | 0.050 | 0.005 | 0.249 | 0.092 | 0.008 | 1.73                  | 35.67                     |
| BL     | 0.034                           | 0.263 | 0.000 | 0.000 | 0.000 | 0.000 | 0.051 | 0.267 | 0.050 | 0.058 | 0.007 | 0.006 | 0.173 | 0.067 | 0.025 | 2.92                  | 6.38                      |
| LH     | 0.032                           | 0.209 | 0.000 | 0.000 | 0.000 | 0.000 | 0.019 | 0.269 | 0.024 | 0.050 | 0.003 | 0.005 | 0.351 | 0.028 | 0.010 | 1.46                  | 5.01                      |
| HY     | 0.021                           | 0.150 | 0.000 | 0.000 | 0.000 | 0.000 | 0.060 | 0.301 | 0.019 | 0.066 | 0.003 | 0.003 | 0.294 | 0.076 | 0.008 | 4.76                  | 19.73                     |

2

**Table S4.** The concentrations of major element for the 13 surface sediments.

3

| Sample | Concentrations (mg/L) |      |        |       |       |        |        |      |      |      |      |
|--------|-----------------------|------|--------|-------|-------|--------|--------|------|------|------|------|
|        | Al                    | Ba   | Ca     | Fe    | K     | Mg     | Na     | Mn   | P    | Si   | Sr   |
| HH     | 59.72                 | 1.26 | 18.34  | 13.51 | 46.55 | 4.75   | 60.00  | 0.14 | 0.25 | 0.52 | 0.32 |
| DL     | 116.29                | 1.40 | 125.76 | 39.56 | 47.00 | 20.62  | 44.74  | 0.72 | 0.61 | 1.12 | 1.38 |
| NL     | 113.82                | 1.20 | 143.29 | 25.82 | 36.79 | 26.69  | 49.85  | 0.76 | 0.67 | 0.97 | 1.29 |
| HM     | 92.94                 | 0.67 | 301.81 | 48.32 | 29.12 | 33.76  | 20.74  | 1.01 | 0.87 | 0.81 | 1.63 |
| SU     | 107.86                | 1.10 | 76.51  | 25.31 | 41.46 | 116.85 | 44.98  | 0.45 | 0.52 | 1.03 | 3.03 |
| HD     | 67.99                 | 1.19 | 25.57  | 15.28 | 46.44 | 9.30   | 91.85  | 0.17 | 0.34 | 0.66 | 0.44 |
| DK     | 112.92                | 1.08 | 87.52  | 36.50 | 42.49 | 68.01  | 82.09  | 0.69 | 0.61 | 1.60 | 1.27 |
| WH     | 111.16                | 0.90 | 113.31 | 58.08 | 39.53 | 33.20  | 83.10  | 1.04 | 0.93 | 0.87 | 1.07 |
| GC     | 44.13                 | 0.16 | 126.33 | 25.18 | 16.35 | 47.08  | 178.05 | 0.36 | 0.59 | 0.83 | 2.56 |
| LN     | 89.24                 | 0.72 | 60.38  | 35.61 | 33.98 | 41.24  | 83.15  | 0.53 | 0.52 | 0.84 | 0.46 |
| BL     | 73.03                 | 0.47 | 169.25 | 36.49 | 25.17 | 47.36  | 92.16  | 0.67 | 0.75 | 1.22 | 4.12 |
| LH     | 64.01                 | 0.50 | 127.65 | 38.61 | 29.19 | 48.24  | 136.99 | 0.66 | 0.66 | 0.78 | 1.83 |
| HY     | 87.36                 | 0.61 | 131.88 | 44.51 | 30.79 | 44.41  | 64.74  | 0.80 | 0.68 | 0.98 | 1.64 |

4

## References

- Schouten, S.; Hopmans, E.C.; Schefuß, E.; Sinninghe Damsté, J.S. Distributional variations in marine crenarchaeotal membrane lipids: a new tool for reconstructing ancient sea water temperatures? *Earth Planet. Sci. Lett.* **2002**, *204*, 265–274, [https://doi.org/10.1016/S0012-821X\(02\)00979-2](https://doi.org/10.1016/S0012-821X(02)00979-2).
- Hopmans, E.C.; Weijers, J.W.; Schefuß, E.; Herfort, L.; Damsté, J.S.S.; Schouten, S. A novel proxy for terrestrial organic matter in sediments based on branched and isoprenoid tetraether lipids. *Earth Planet. Sci. Lett.* **2004**, *224*, 107–116, <https://doi.org/10.1016/j.epsl.2004.05.012>.
- Turich, C.; Freeman, K.H. Archaeal lipids record paleosalinity in hypersaline systems. *Org. Geochem.* **2011**, <https://doi.org/10.1016/j.orggeochem.2011.06.002>.
- Xie, S.; Pancost, R.; Chen, L.; Evershed, R.P.; Yang, H.; Zhang, K.; Huang, J.; Xu, Y. Microbial lipid records of highly alkaline deposits and enhanced aridity associated with significant uplift of the Tibetan Plateau in the Late Miocene. *Geology* **2012**, *40*, 291–294, <https://doi.org/10.1130/g32570.1>.
- Weijers, J.W.; Schouten, S.; Donker, J.C.V.D.; Hopmans, E.C.; Damsté, J.S.S. Environmental controls on bacterial tetraether membrane lipid distribution in soils. *Geochim. et Cosmochim. Acta* **2007**, *71*, 703–713, <https://doi.org/10.1016/j.gca.2006.10.003>.
- Peterse, F.; van der Meer, J.; Schouten, S.; Weijers, J.W.; Fierer, N.; Jackson, R.B.; Kim, J.-H.; Sinninghe Damsté, J.S. Revised calibration of the MBT-CBT paleotemperature proxy based on branched tetraether membrane lipids in surface soils. *Geochim. Cosmochim. Acta* **2012**, *96*, 215–229, <https://doi.org/10.1016/j.gca.2012.08.011>.
- De Jonge, C.; Stadnitskaia, A.; Fedotov, A.; Damsté, J.S.S. Impact of riverine suspended particulate matter on the branched glycerol dialkyl glycerol tetraether composition of lakes: The outflow of the Selenga River in Lake Baikal (Russia). *Org. Geochem.* **2015**, *83–84*, 241–252, <https://doi.org/10.1016/j.orggeochem.2015.04.004>.
- Dang, X.; Ding, W.; Yang, H.; Pancost, R.D.; Naafs, B.D.A.; Xue, J.; Lin, X.; Lu, J.; Xie, S. Different temperature dependence of the bacterial brGDGT isomers in 35 Chinese lake sediments compared to that in soils. *Org. Geochem.* **2018**, *119*, 72–79, <https://doi.org/10.1016/j.orggeochem.2018.02.008>.
- Tierney, J.; Russell, J.; Eggermont, H.; Hopmans, E.; Verschuren, D.; Damsté, J.S. Environmental controls on branched tetraether lipid distributions in tropical East African lake sediments. *Geochim. et Cosmochim. Acta* **2010**, *74*, 4902–4918, <https://doi.org/10.1016/j.gca.2010.06.002>.
- Loomis, S.E.; Russell, J.M.; Ladd, B.; Street-Perrott, F.A.; Damsté, J.S.S. Calibration and application of the branched GDGT temperature proxy on East African lake sediments. *Earth Planet. Sci. Lett.* **2012**, *357–358*, 277–288, <https://doi.org/10.1016/j.epsl.2012.09.031>.
- Sun, Q.; Chu, G.; Liu, M.; Xie, M.; Li, S.; Ling, Y.; Wang, X.; Shi, L.; Jia, G.; Lü, H. Distributions and temperature dependence of branched glycerol dialkyl glycerol tetraethers in recent lacustrine sediments from China and Nepal. *J. Geophys. Res.-Biogeosci.* **2011**, *116*, 2005–2012, <https://doi.org/10.1029/2010JG001365>.
- Pearson, E.J.; Juggins, S.; Talbot, H.M.; Weckström, J.; Rosén, P.; Ryves, D.B.; Roberts, S.J.; Schmidt, R. A lacustrine GDGT-temperature calibration from the Scandinavian Arctic to Antarctic: renewed potential for the application of GDGT-paleothermometry in lakes. *Geochim. Cosmochim. Acta* **2011**, *75*, 6225–6238, <https://doi.org/10.1016/j.gca.2011.07.042>.
- Foster, L.C.; Pearson, E.J.; Juggins, S.; Hodgson, D.A.; Saunders, K.M.; Verleyen, E.; Roberts, S.J. Development of a regional glycerol dialkyl glycerol tetraether (GDGT)-temperature calibration for Antarctic and sub-Antarctic lakes. *Earth Planet. Sci. Lett.* **2016**, *433*, 370–379, <https://doi.org/10.1016/j.epsl.2015.11.018>.
- Günther, F.; Thiele, A.; Gleixner, G.; Xu, B.; Yao, T.; Schouten, S. Distribution of bacterial and archaeal ether lipids in soils and surface sediments of Tibetan lakes: Implications for GDGT-based proxies in saline high mountain lakes. *Org. Geochem.* **2014**, *67*, 19–30, <https://doi.org/10.1016/j.orggeochem.2013.11.014>.
